# Supplementary material for: Synthesis of CuO and Cu2O nano/microparticles from a single precursor: effect of temperature on CuO/Cu2O formation and morphology dependent nitroarene reduction
Source: Royal Society of Chemistry journal article supplement (doi:10.1039/c6ra16553b), 2016-01-01
Supplement: c6ra16553b1.pdf [file c6ra16553b1.pdf]

**Synthesis of CuO and Cu<sub>2</sub>O nano/microparticles from single precursor: Effect of temperature on CuO/Cu<sub>2</sub>O formation and morphology dependent nitroarenes reduction**

V. Vinod Kumar,<sup>a</sup> A. Dharani,<sup>a</sup> Mariappan Mariappan<sup>b</sup> and Savarimuthu Philip Anthony<sup>a\*</sup>

<sup>a</sup>School of Chemical & Biotechnology, SASTRA University, Thanjavur-613401, Tamil Nadu, India. Fax: +914362264120; Tel: +914362264101; E-mail: [philip@biotech.sastra.edu](mailto:philip@biotech.sastra.edu)

<sup>b</sup>Department of Chemistry, SRM University, Chennai-603203, Tamil Nadu, India.

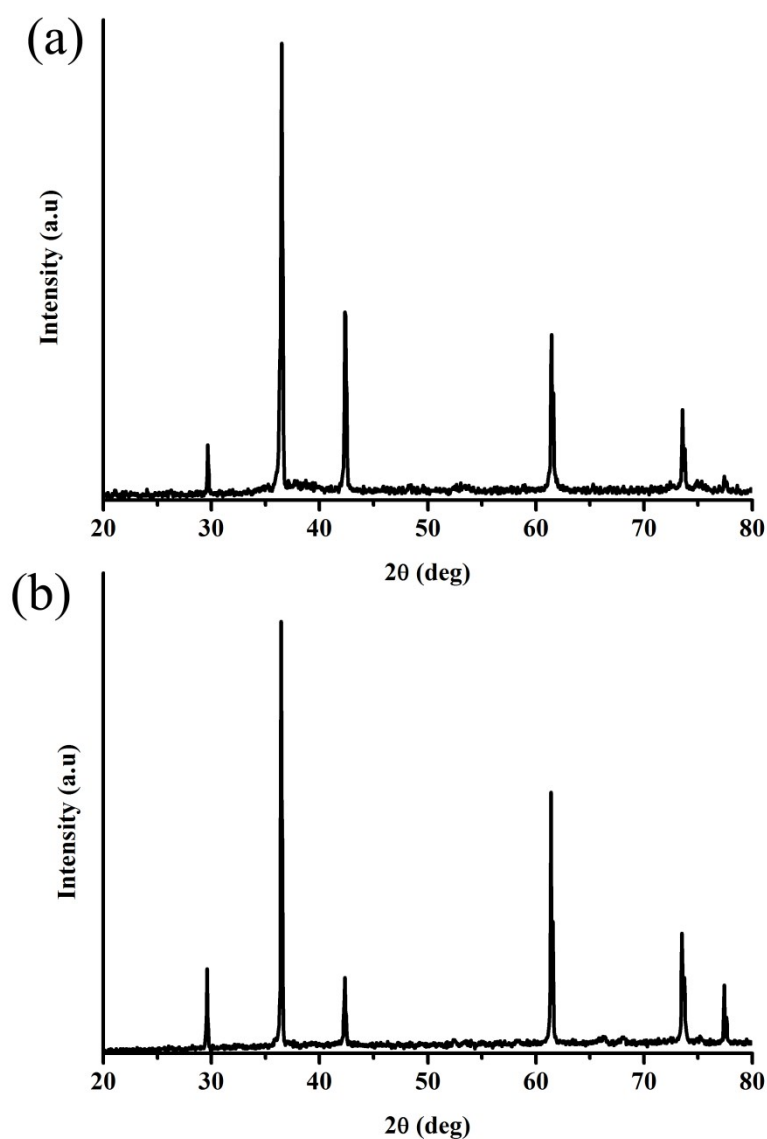

Fig. S1. PXRD pattern of Cu<sub>2</sub>O nano/microparticles obtained by hydrothermal heating of Cu(NO<sub>3</sub>)<sub>2</sub> with (a) acetic acid and (b) formic acid at 175 °C.

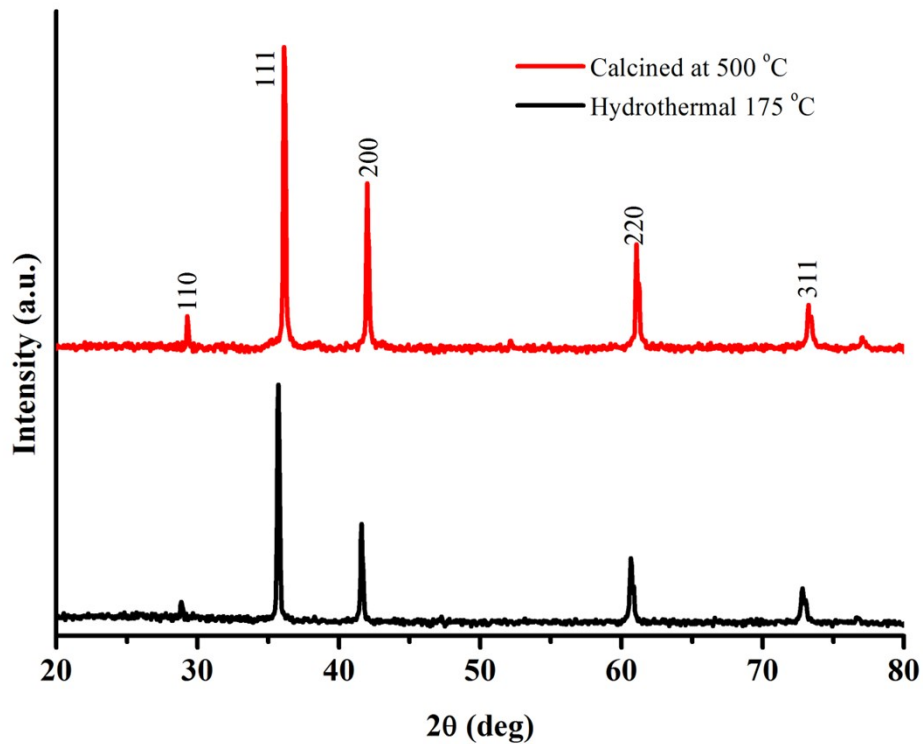

Fig. S2. PXRD pattern of hydrothermally synthesized Cu<sub>2</sub>O nano/microparticles and same materials calcined at 500 °C.

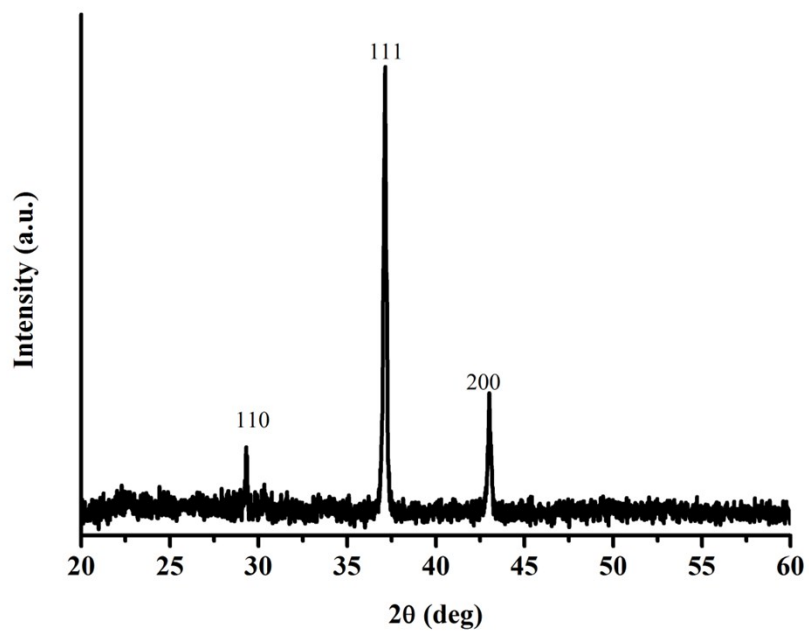

Fig. S3. PXRD pattern of hydrothermally treated CuO-1 nano/microparticles in presence of acetic acid at 175 °C.

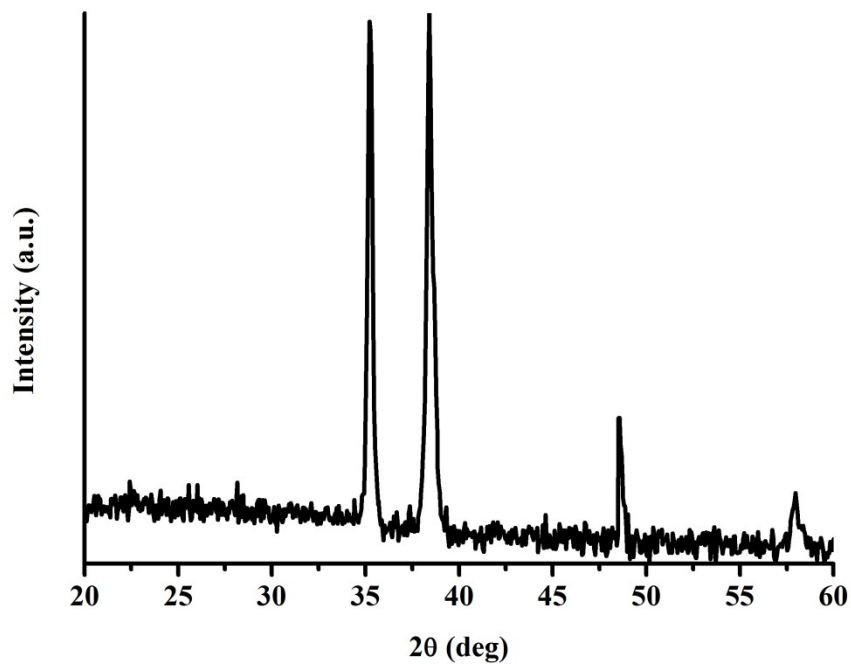

Fig. S4. PXRD pattern of hydrothermally synthesized CuO nano/microparticles from  $\text{Cu}(\text{OAc})_2$  precursor at 125 °C and same materials calcined at 500 °C.

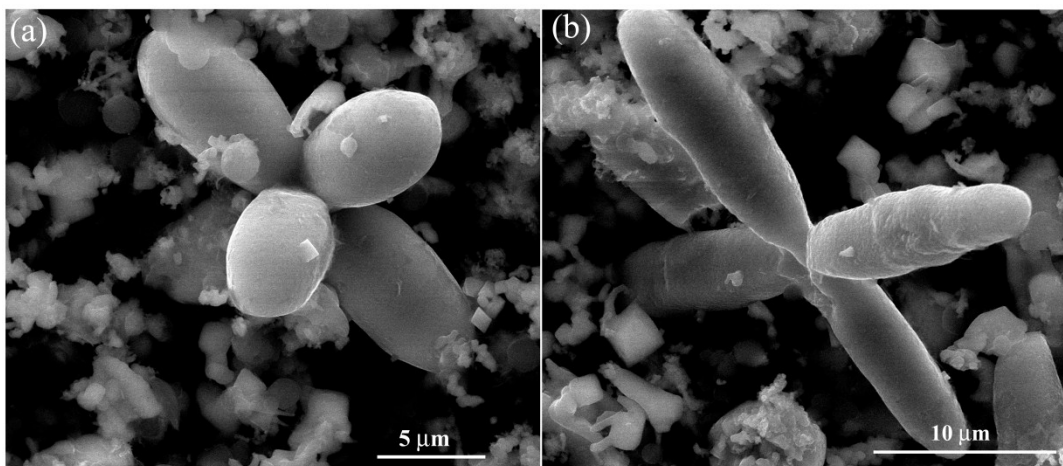

Fig. S5. FE-SEM images of  $\text{Cu}_2\text{O}$  nano/microparticles synthesized from  $\text{Cu}(\text{acac})_2$  precursor in hydrothermal method.

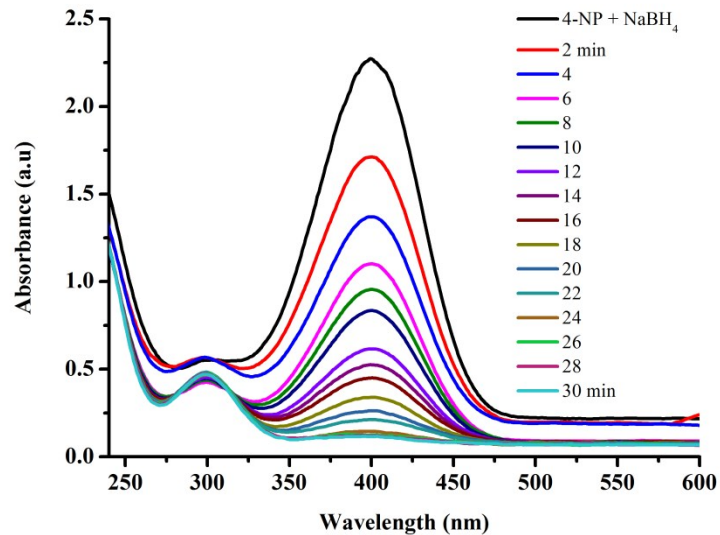

Fig. S6. Monitoring the conversion of 4-NP to 4-AP by CuO nano/microparticles synthesized hydrothermally at 125 °C from Cu(OAc)<sub>2</sub> precursor.

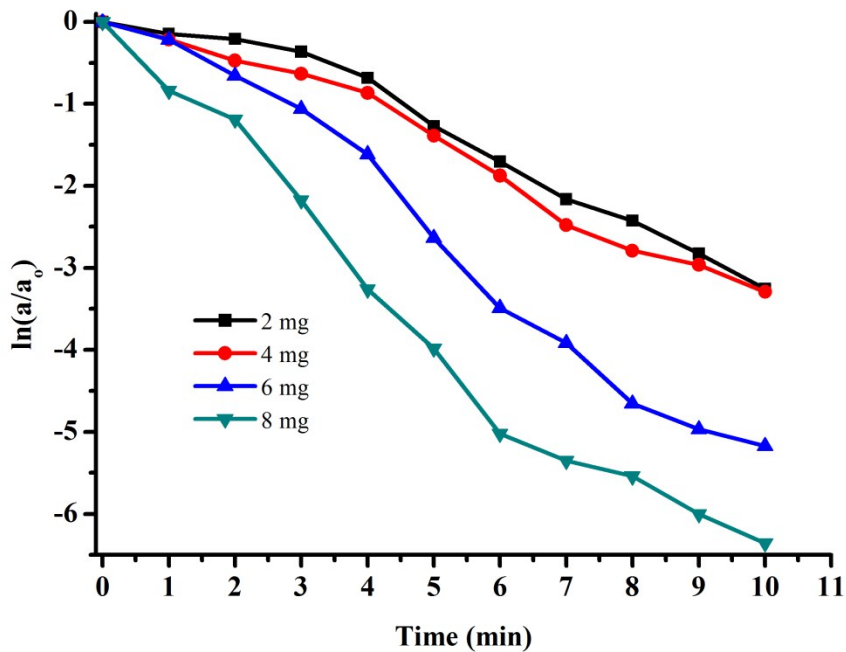

Fig. S7. Effect of CuO nano/microparticles concentration on the nitro group reduction rate of 4-NP.

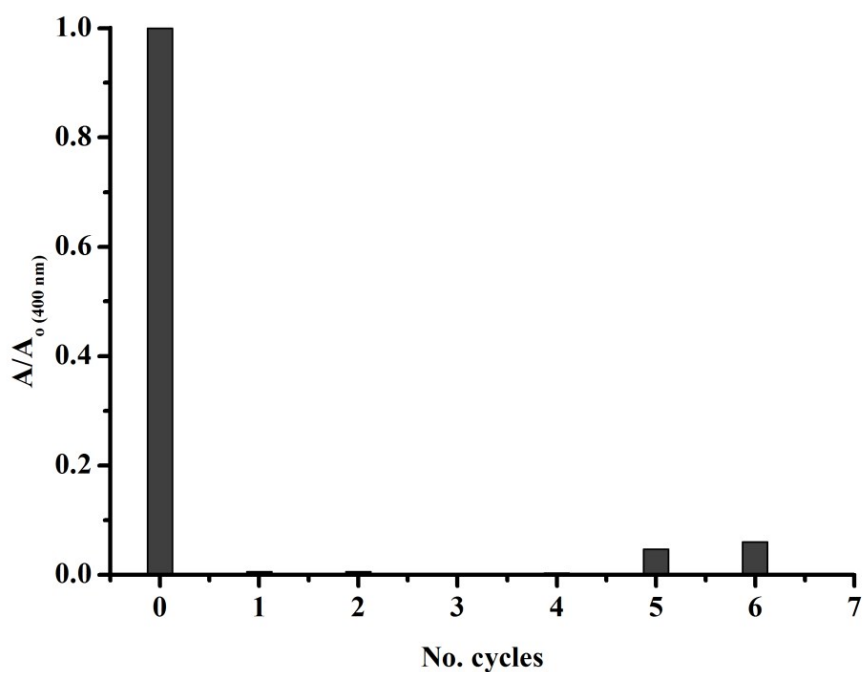

Fig. S8. Reusability of CuO nano/microparticles for nitro group reduction of 4-NP.

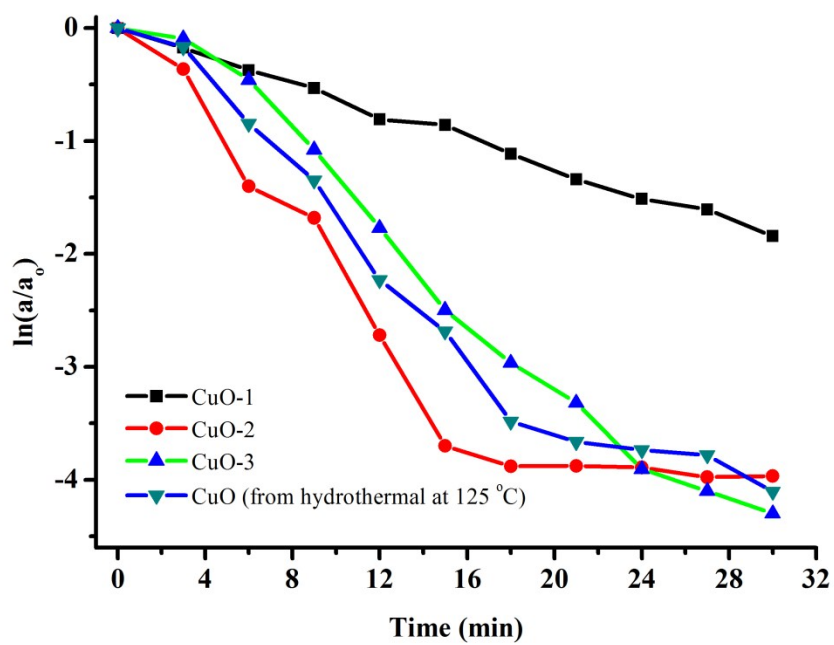

Fig. S9. Comparing the reduction of 2-NA by different CuO nano/microparticles.

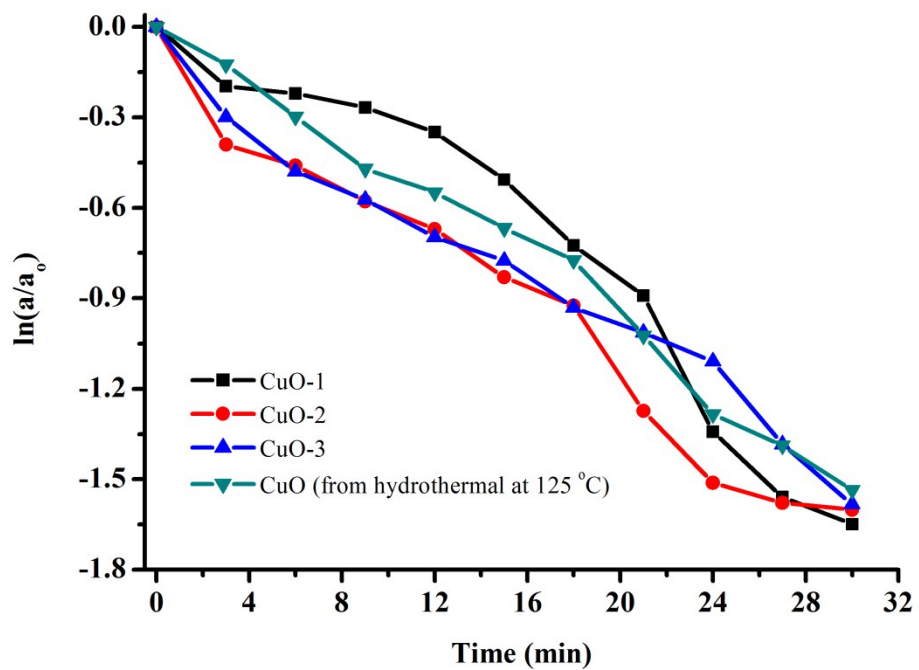

Fig. S10. Comparing the reduction of 3-NA by different CuO nano/microparticles.
